# Supplementary material
Source: Springer Nature journal article supplement (https://www.springermedizin.de/resource/supplementary/13054_2009_8332_MOESM3_ESM.pdf/9731728)
Supplement: MOESM3 [file 9731728]

| Exposure Definition | N | 30-day Adjusted MRR (95% CI) |
|---------------------|---|------------------------------|
|---------------------|---|------------------------------|

**Statin Use**

|                            |       |                  |
|----------------------------|-------|------------------|
| Current Users              | 12483 | 0.77 (0.69–0.86) |
| New Users                  | 12483 | 0.68 (0.51–0.90) |
| Long-term Users            | 12483 | 0.81 (0.72–0.91) |
| Former Users               | 12483 | 0.88 (0.73–1.06) |
| Other Lipid Lowering Drugs | 12483 | 1.29 (0.80–2.08) |

**Types of Statins**

|               |       |                  |
|---------------|-------|------------------|
| Simvastatin   | 12483 | 0.74 (0.65–0.84) |
| Atorvastatin  | 12483 | 0.95 (0.72–1.25) |
| Pravastatin   | 12483 | 0.96 (0.71–1.30) |
| Other Statins | 12483 | 0.96 (0.62–1.47) |

**Subgroup Analyses (Exposure: Current Statin Use)**

**Charlson Score**

|        |      |                  |
|--------|------|------------------|
| Low    | 3846 | 0.61 (0.43–0.85) |
| Medium | 5142 | 0.82 (0.69–0.98) |
| High   | 3495 | 0.78 (0.66–0.93) |

**Discharge Diagnosis**

|              |      |                  |
|--------------|------|------------------|
| Infection    | 296  | 0.97 (0.57–1.66) |
| Cancer       | 1770 | 0.78 (0.51–1.18) |
| Diabetes     | 159  | 1.91 (0.48–7.64) |
| Card. Dis.   | 3628 | 0.88 (0.74–1.05) |
| Resp. Dis.   | 1181 | 0.73 (0.50–1.09) |
| Gast. Dis.   | 1350 | 0.76 (0.54–1.06) |
| Trauma/Pois. | 1519 | 0.52 (0.30–0.91) |
| Other        | 2580 | 0.74 (0.58–0.95) |

**Further Subgrouping**

|                                 |       |                  |
|---------------------------------|-------|------------------|
| Patients w/o Cancer             | 10713 | 0.77 (0.69–0.87) |
| Patients w. Diab. or Card. Dis. | 3787  | 0.88 (0.74–1.05) |
| Mechanical Ventilation          | 5817  | 0.78 (0.68–0.90) |
| Renal Replacement Therapy       | 1090  | 0.85 (0.66–1.10) |
| Medical Departments             | 5014  | 0.84 (0.72–0.97) |
| Surgical Departments            | 7469  | 0.72 (0.61–0.85) |

**Surgical Procedure**

|            |      |                  |
|------------|------|------------------|
| No Surgery | 6956 | 0.76 (0.66–0.87) |
| Surgery    | 5527 | 0.81 (0.67–0.97) |

0.2 0.5 1 1.5 2 2.5
